# Supplementary material for: Retrieval of Hyperspectral Information from Multispectral Data for Perennial Ryegrass Biomass Estimation
Source: MDPI journal article supplement (doi:10.3390/s20247192), 2020-12-15
Supplement: s1 [file s1]

# Retrieval of Hyperspectral Information from Multispectral Data for Perennial Ryegrass Biomass Estimation

## Annex 1. Vegetation Indices Formulas

### Current Method:

Normalized Difference Vegetation Index (NDVI)

$$NDVI = \frac{B_{NIR} - B_{Red}}{B_{NIR} + B_{Red}} \quad (1)$$

Green Normalized Difference Vegetation Index (GNDVI)

$$GNDVI = \frac{B_{NIR} - B_{Green}}{B_{NIR} + B_{Green}} \quad (2)$$

Normalized Difference Red Edge Index (NDRE)

$$NDRE = \frac{B_{NIR} - B_{Red\ Edge}}{B_{NIR} + B_{Red\ Edge}} \quad (3)$$

Normalized Green Red Difference Index (NGRDI)

$$NGRDI = \frac{B_{Green} - B_{Red}}{B_{Green} + B_{Red}} \quad (4)$$

Leaf Chlorophyll Index (LCI)

$$LCI = \frac{B_{NIR} - B_{Red\ Edge}}{B_{NIR} + B_{Red}} \quad (5)$$

Structure Intensive Pigment Index 2 (SIPI2)

$$SIPI2 = \frac{B_{NIR} - B_{Green}}{B_{NIR} - B_{Red}} \quad (6)$$

### Proposed Method:

Optimized Normalized Ratio index- refer to O. Mutanga & Skidmore, (2004):

$$Opt\ NRI = \frac{B_{755} - B_{745}}{B_{755} + B_{745}} \quad (7)$$

Normalized Band Depth Index -refer to Mutanga & Skidmore (2004):

$$NDBI_{\lambda} = \frac{BD_{\lambda} - Dc}{BD_{\lambda} + Dc} \quad (8)$$

Band Area:

$$Band\ Area = \int_{550}^{790} 1 - BD \quad (9)$$

For the calculation of these indices refer to <https://cran.r-project.org/web/packages/hsdar/>.

## References:

1. Mutanga, O.; Skidmore, A. K. Narrow band vegetation indices overcome the saturation problem in biomass estimation. *International Journal of Remote Sensing*, **2004**, *25*(19), 3999–4014. <https://doi.org/10.1080/01431160310001654923>
2. Mutanga, O.; Skidmore, A. K. Hyperspectral band depth analysis for a better estimation of grass biomass (*Cenchrus ciliaris*) measured under controlled laboratory conditions. *International Journal of Applied Earth Observation and Geoinformation*, **2004**, *5*(2), 87–96. <https://doi.org/10.1016/j.jag.2004.01.001>

**Publisher's Note:** MDPI stays neutral with regard to jurisdictional claims in published maps and institutional affiliations.

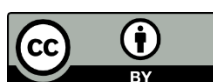

© 2020 by the authors. Licensee MDPI, Basel, Switzerland. This article is an open access article distributed under the terms and conditions of the Creative Commons Attribution (CC BY) license (<http://creativecommons.org/licenses/by/4.0/>).
